# Supplementary material for: Relationship between Tolerance and Persistence Mechanisms in Acinetobacter baumannii Strains with AbkAB Toxin-Antitoxin System
Source: PubMed Central journal article supplement (PMC5923160; doi:10.1128/aac.00250-18), 2018-04-26
Supplement: AAC.00250-18_zac005187102s1.pdf [file AAC.00250-18_zac005187102s1.pdf]

| Isolate             | MIC (mg/L) |      |     |     |     |     |     |     |      |     |     |     |      |     |     |
|---------------------|------------|------|-----|-----|-----|-----|-----|-----|------|-----|-----|-----|------|-----|-----|
|                     | SUL        | CAZ  | IMP | MEM | CIP | GEN | TOB | AMK | MIN  | NET | TET | DOX | CST  | RIF | TGC |
| Ab-2 clon 2010      | 64         | >128 | 64  | 32  | 32  | 2   | 32  | 32  | <0.5 | >64 | >64 | 16  | <0.5 | 1   | 0.5 |
| Ab-2 clon 2010-CHLX | 32         | >128 | 64  | 32  | 32  | 2   | 32  | 16  | <0.5 | 64  | >64 | 16  | <0.5 | 1   | 0.5 |

**Table S1.** MICs of several antimicrobials for the bacterial isolates used in the study.

|          | <b>GO. ID</b>     | <b>Term</b>                                          | <b>Annotated</b> | <b>Significant</b> | <b>Expected</b> | <b>ClassicFisher</b> |
|----------|-------------------|------------------------------------------------------|------------------|--------------------|-----------------|----------------------|
| 1        | GO:0030001        | metal ion transport                                  | 27               | 20                 | 11.28           | 0.00063              |
| 2        | GO:0006813        | potassium ion transport                              | 11               | 10                 | 4.6             | 0.00108              |
| 3        | GO:0015672        | monovalent inorganic cation transport                | 25               | 18                 | 10.45           | 0.00206              |
| 4        | GO:0006812        | cation transport                                     | 46               | 29                 | 19.22           | 0.00266              |
| <b>5</b> | <b>GO:0019222</b> | <b>regulation of metabolic process</b>               | <b>213</b>       | <b>105</b>         | <b>89.02</b>    | <b>0.01142</b>       |
| <b>6</b> | <b>GO:0032774</b> | <b>RNA biosynthetic process</b>                      | <b>211</b>       | <b>104</b>         | <b>88.18</b>    | <b>0.01187</b>       |
| <b>7</b> | <b>GO:0060255</b> | <b>regulation of macromolecule metabolic process</b> | <b>211</b>       | <b>104</b>         | <b>88.18</b>    | <b>0.01187</b>       |
| 8        | GO:0006805        | xenobiotic metabolic process                         | 5                | 5                  | 2.09            | 0.01265              |
| 9        | GO:0009410        | response to xenobiotic stimulus                      | 5                | 5                  | 2.09            | 0.01265              |
| 10       | GO:0010124        | Phenylacetate catabolic process                      | 5                | 5                  | 2.09            | 0.01265              |

**Table S2.** Using the TopGO software tool (version 3.3) and a Fisher test, the GO term enrichment analysis was performed. This enrichment has been made from the previously made InterProtScan annotation that allowed us to relate 1852 genes with GO terms, of which 774 were included within the SDRs identified in common by the software EdgeR and DESeq2. This analysis has made it possible to identify that there is an enrichment of the differentially expressed genes that are associated with the terms GO: 0030001 ("metal ion transport"), GO: 0006813 ("potassium ion transport"), GO: 0015672 ("monovalent inorganic cation" transport ") and GO: 0006812 (" cation transport "). The reference value to consider a term as significant has been p-value <0.01. In this Table S1, it shows the enrichment values according to the GO terms.

| PRIMERS and PROBES for RT-PCR STUDIES  |     |                          |                                         |                         |
|----------------------------------------|-----|--------------------------|-----------------------------------------|-------------------------|
| Genes /Function                        |     | Primer Sequences (5'-3') | Taqman Probes                           | References              |
| <i>abaR/Quorum Sensing</i>             | Fow | ACCTCTTGTTTGGTCGAGTCA    | 96/ACAGGCAG                             | (1)                     |
|                                        | Rev | CGTGCTTCCTCCCAAAAAT      |                                         |                         |
| <i>abaI/ Quorum Sensing</i>            | Fow | CCGCTACAGGGTATTTGTTGAAT  | 6FAM-<br>TGGATTCTCTGTCTTGAGCCACGACA-BBQ | (1)                     |
|                                        | Rev | GCAGGGAATAGGCATTCCATTG   |                                         |                         |
| <i>bla<sub>OXA24</sub> β-lactamase</i> | Rev | CAAATAAAGAATATGTCCCTGC   | -                                       | This study <sup>a</sup> |
|                                        | Fow | CTGCATTAGCTCTAGGCCAGT    |                                         |                         |
| <i>abkA antitoxin</i>                  | Rev | GATAACCTTTGCCTTGTGC      | -                                       | This study <sup>a</sup> |
|                                        | Fow | CGCTTGCTTGCTAAAGGCAC     |                                         |                         |
| <i>abkB toxin</i>                      | Rev | CTCATATTTGTTTCGCTCCGC    | -                                       | This study <sup>a</sup> |
|                                        | Fow | GATCCATTACGGATCTCAATCC   |                                         |                         |

**Table S3.** Primers and probes used in this study. <sup>a</sup>Using LightCycler FastStrand DNA Master SYBR green I (Roche, Mannheim, Germany).

## REFERENCES

1. López M, Mayer C, Fernández-García L, Blasco L, Muras A, Ruiz FM, Bou G, Otero A, Tomás M; GEIH-GEMARA (SEIMC). 2017. Quorum sensing network in clinical strains of *A. baumannii*: AidA is a new quorum quenching enzyme. PLoS One. 12(3):e0174454.

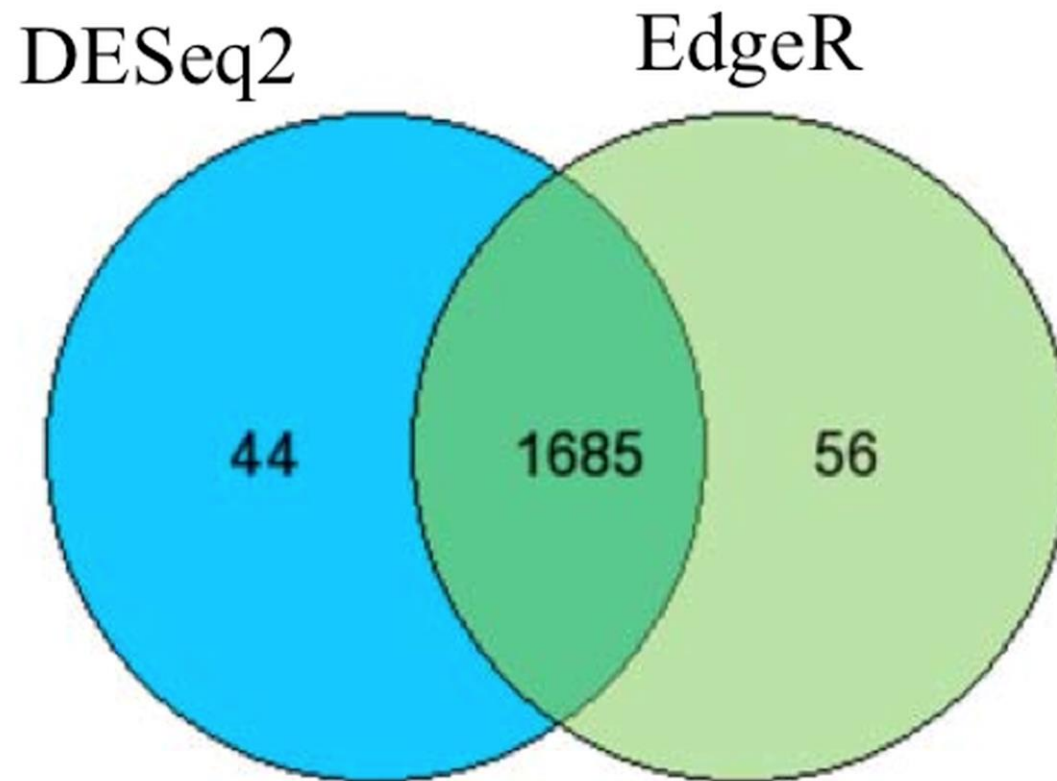

**Fig 1S.** Venn Diagram. Total number of genes differentially expressed between the groups (RNAs from *Ab-2\_clon\_2010* versus *Ab-2\_clon\_2010-CHLX*) identified in common between both methods. With respect to the previous report, we observed a greater number of differentially expressed genes identified by both packages (1685 vs 1204 differentially expressed genes).

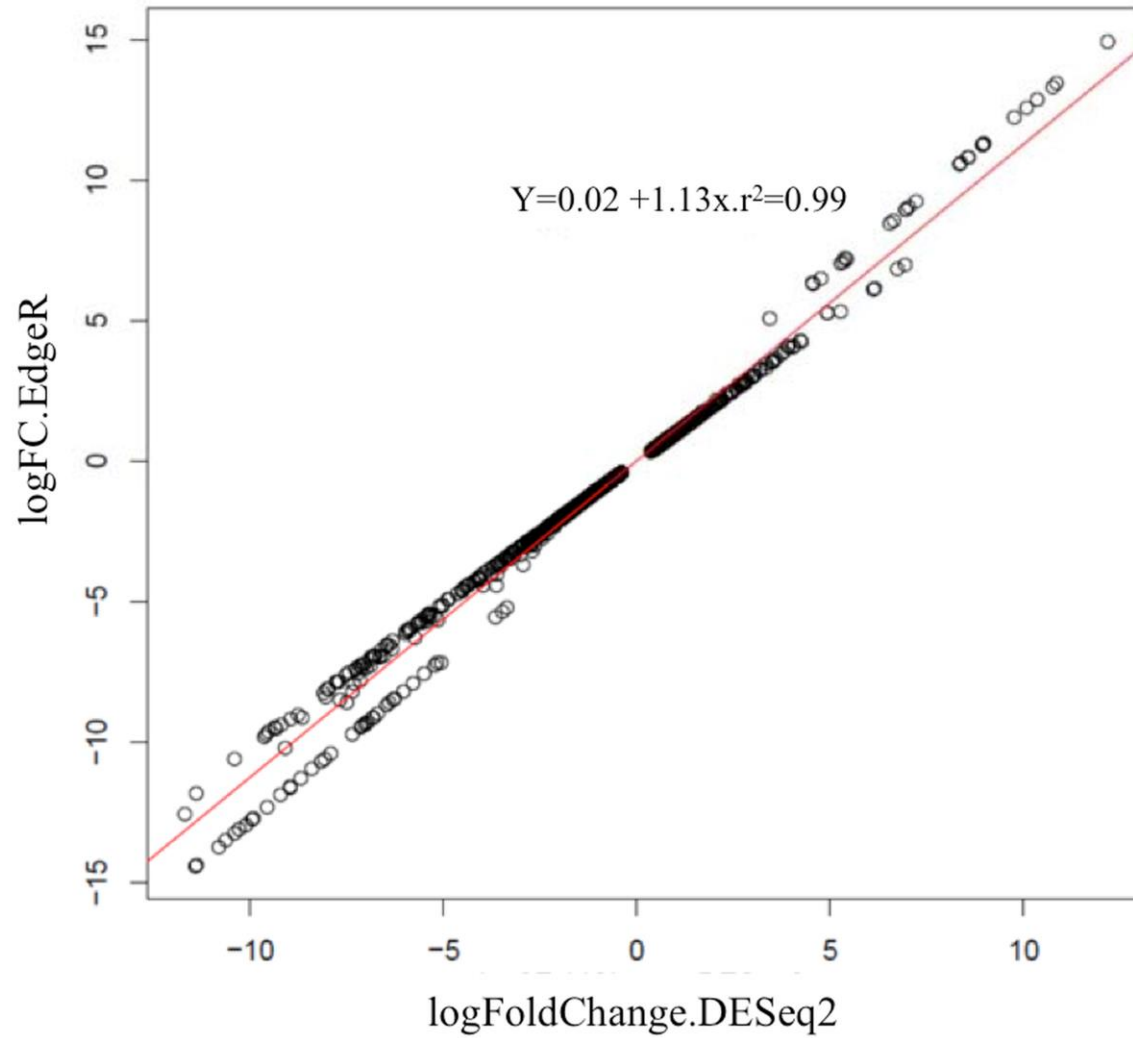

**Figure 2S.** Comparison of the LogFoldChange identified by EdgeR and DESeq2 for each of the differentially expressed genes.
